# Supplementary material for: Aging is associated with increased brain iron through cortex-derived hepcidin expression
Source: eLife. 2022 Jan 11;11:e73456. doi: 10.7554/eLife.73456 (PMC8752087; doi:10.7554/eLife.73456)
Supplement: Figure 1—source data 2. [file elife-73456-fig1-data2.xlsx]

## Sheet: Iron measurement
Liver iron	Protein Conc (mg/mL)	Non-heme iron (µmol/L)	Non-heme iron (nmol/mg protein)		Heme-iron (µmol/L)	Heme iron (nmol/mg protein)
Cytosol Young 1	1.456	14.8865	10.2242		19.4943	13.3889
Cytosol Young 2	1.334	13.132	9.84408		14.4353	10.821
Cytosol Young 3	1.764	13.77	7.80612		34.6878	19.6643
Cytosol Young 4	2.629	18.43	7.01027		35.018	13.3199
Cytosol Young 5	1.003	8.246	8.22134		7.836	7.81256
Cytosol Young 6	2.077	14.0095	6.74506		26.9428	12.972
Cytosol Aged 1	1.946	22.9895	11.8137		22.8525	11.7433
Cytosol Aged 2	1.141	11.849	10.3848		16.051	14.0675
Cytosol Aged 3	0.714	12.0815	16.9209		6.96	9.7479
Cytosol Aged 4	2.097	27.7825	13.2487		43.7463	20.8613
Cytosol Aged 5	1.802	19.626	10.8912		27.7238	15.385
Cytosol Aged 6	1.653	31.265	18.9141		22.7907	13.7875
Mitochondrial Young 1	1.053	3.5265	3.349		0.917	0.870845
Mitochondrial Young 2	1.126	2.8555	2.53597		0.7435	0.660302
Mitochondrial Young 3	1.094	4.105	3.75229		0.9295	0.849634
Mitochondrial Young 4	1.459	3.859	2.64496		0.9965	0.683002
Mitochondrial Young 5	0.796	1.938	2.43467		0.2945	0.369975
Mitochondrial Young 6	1.856	3.7125	2.00027		0.99	0.533405
Mitochondrial Aged 1	1.274	3.786	2.97174		1.89	1.48352
Mitochondrial Aged 2	0.753	2.5165	3.34197		0.88	1.16866
Mitochondrial Aged 3	0.748	2.131	2.84893		0.5195	0.694519
Mitochondrial Aged 4	1.39	5.6805	4.08669		1.3455	0.967986
Mitochondrial Aged 5	1.066	3.2275	3.02767		0.768	0.72045
Mitochondrial Aged 6	0.971	4.6965	4.83677		0.6605	0.680227
Gastrocnemius muscle iron	Protein Conc (mg/mL)	Non-heme iron (µmol/L)	Non-heme iron (nmol/mg protein)		Heme-iron (µmol/L)	Heme iron (nmol/mg protein)
Cytosol Young 1	0.963	1.182	1.22741		3.4625	3.59553
Cytosol Young 2	0.845	0.8835	1.04556		0.8815	1.0432
Cytosol Young 3	0.835	4.417	5.28982	Outlier excluded	4.872	5.83473
Cytosol Young 4	0.903	1.8115	2.00609		3.2575	3.60742
Cytosol Young 5	0.612	0.857	1.40033		1.979	3.23366
Cytosol Young 6	1.487	1.7915	1.20477		10.016	6.73571
Cytosol Aged 1	0.852	1.48	1.73709		1.062	1.24648
Cytosol Aged 2	0.742	1.871	2.52156		2.131	2.87197
Cytosol Aged 3	0.776	1.6925	2.18106		4.981	6.41881
Cytosol Aged 4	0.889	2.13	2.39595		4.086	4.59618
Cytosol Aged 5	1.088	2.302	2.11581		8.956	8.23162
Cytosol Aged 6	1.416	3.396	2.39831		14.6665	10.3577
Mitochondrial Young 1	0.305	0.1015	0.332787		-0.177	-0.580328	N/A
Mitochondrial Young 2	0.358	-0.144	-0.402235	Outlier excluded	-0.296	-0.826816	N/A
Mitochondrial Young 3	0.443	0.3795	0.856659		-0.2215	-0.5	N/A
Mitochondrial Young 4	0.616	0.1805	0.293019		-0.087	-0.141234	N/A
Mitochondrial Young 5	0.438	-0.025	-0.0570776	Outlier excluded	-0.1695	-0.386986	N/A
Mitochondrial Young 6	0.725	0.2605	0.35931		-0.061	-0.0841379	N/A
Mitochondrial Aged 1	0.292	0.28	0.958904		-0.21	-0.719178	N/A
Mitochondrial Aged 2	0.221	0.1345	0.608597		-0.081	-0.366516	N/A
Mitochondrial Aged 3	0.205	0.1345	0.656098		-0.205	-1	N/A
Mitochondrial Aged 4	0.221	0.1675	0.757919		-0.1865	-0.843891	N/A
Mitochondrial Aged 5	0.279	0.154	0.551971		-0.134	-0.480287	N/A
Mitochondrial Aged 6	0.434	0.2735	0.630184		-0.097	-0.223502	N/A
Brain iron	Protein Conc (mg/mL)	Non-heme iron (µmol/L)	Non-heme iron (nmol/mg protein)		Heme-iron (µmol/L)	Heme iron (nmol/mg protein)
Cytosol Young 1	1.065	1.011	0.949296		3.7215	3.49437
Cytosol Young 2	0.907	0.3345	0.368798		2.8695	3.16373
Cytosol Young 3	1.418	0.832	0.586742		4.166	2.93794
Cytosol Young 4	1.32	1.554	1.17727		3.7575	2.84659
Cytosol Young 5	1.263	0.9445	0.747823		3.2015	2.53484
Cytosol Young 6	0.736	0.606	0.82337		1.8405	2.50068
Cytosol Aged 1	1.1	1.6665	1.515		5.9625	5.42045
Cytosol Aged 2	0.942	1.8125	1.9241		4.3215	4.58758
Cytosol Aged 3	1.357	2.3095	1.70192		5.3165	3.91783
Cytosol Aged 4	0.837	1.892	2.26045		2.3215	2.7736
Cytosol Aged 5	1.724	2.31	1.33991		4.1355	2.39878
Cytosol Aged 6	0.79	1.256	1.58987		1.58	2
Mitochondrial Young 1	1.513	1.097	0.72505		0.41	0.270985
Mitochondrial Young 2	1.945	0.7655	0.393573		0.342	0.175835
Mitochondrial Young 3	2.603	1.2095	0.464656		0.3445	0.132347
Mitochondrial Young 4	2.339	1.1895	0.508551		0.422	0.180419
Mitochondrial Young 5	2.894	1.455	0.502764		0.49	0.169316
Mitochondrial Young 6	1.906	0.7585	0.397954		0.175	0.0918153
Mitochondrial Aged 1	1.742	1.0175	0.584099		0.33	0.189437
Mitochondrial Aged 2	1.613	1.64	1.01674		0.241	0.149411
Mitochondrial Aged 3	2.394	2.2235	0.92878		0.444	0.185464
Mitochondrial Aged 4	1.006	1.037	1.03082		0.287	0.285288
Mitochondrial Aged 5	1.86	1.8655	1.00296		0.3615	0.194355
Mitochondrial Aged 6	0.8	0.812	1.015		0.0985	0.123125
