# Supplementary material for: Aging is associated with increased brain iron through cortex-derived hepcidin expression
Source: eLife. 2022 Jan 11;11:e73456. doi: 10.7554/eLife.73456 (PMC8752087; doi:10.7554/eLife.73456)
Supplement: Figure 1—source data 3. [file elife-73456-fig1-data3.xlsx]

## Sheet: Densitometry
Membrane TS17	FTN-H	Average of Young	ratio		FTN-L	Average of Young	ratio		IRP2	Average of Young	ratio		GAPDH	Average of Young	ratio		R FTN-H/GAPDH	R FTN-L/GAPDH	R IRP2/GAPDH
Young brain 1	1731.23	1277.5	1.35517		158.021	111.033	1.42319		6110.42	5864.13	1.042		7328.91	7890.24	0.928858		1.43229	1.52448	1.11964
Young brain 2	1360.16		1.0647		67.778		0.61043		5095.76		0.868972		7404.62		0.938453		1.11379	0.647192	0.924172
Young brain 3	1078.04		0.843866		150.556		1.35595		5879.35		1.0026		8493.57		1.07647		0.769592	1.2533	0.929577
Young brain 4	940.577		0.736261		67.778		0.61043		6370.98		1.08643		8333.86		1.05622		0.684326	0.575028	1.02661
Aged brain 1	3491.94		2.73341		835.163		7.52174		5126.15		0.874155		8138.57		1.03147		2.60156	7.25554	0.845844
Aged brain 2	3720.82		2.91257		1252.04		11.2763		4653.45		0.793545		7474.45		0.947303		3.01839	11.8437	0.836069
Aged brain 3	5534.6		4.33235		1198.75		10.7963		2951.03		0.503235		8769.1		1.11139		3.82689	9.6654	0.451924
Aged brain 4	5316.67		4.16176		960.749		8.6528		3702.45		0.631372		8673.52		1.09927		3.71672	7.8318	0.573245
