# Supplementary material for: Aging is associated with increased brain iron through cortex-derived hepcidin expression
Source: eLife. 2022 Jan 11;11:e73456. doi: 10.7554/eLife.73456 (PMC8752087; doi:10.7554/eLife.73456)
Supplement: Figure 2—source data 2. [file elife-73456-fig2-data2.xlsx]

## Sheet: qRT-PCR Liver
Liver qRT-PCR	HPRT	TfR1	HPRT	DCT	RE	TFR1		FPN1	HPRT	DCT	RE	FPN1		MFRN2	HPRT	DCT	RE	MFRN2		DMT1	HPRT	DCT	RE	DMT1		PCBP1	HPRT	DCT	RE	PCBP1		ABCB7	HPRT	DCT	RE	ABCB7		ABCB8	HPRT	DCT	RE	ABCB8		ALR1	HPRT	DCT	RE	ALR1
Young 1	21.7927	24.3587	21.7927	2.566	168872	0.890955		21.2227	21.7927	-0.57	1.48452e+06	1.12557		22.9072	21.7927	1.1145	461851	0.956344		22.8191	21.7927	1.0264	490934	1.28109		19.1658	21.7927	-2.6269	6.17697e+06	1.09775		21.5632	21.7927	-0.2295	1.17243e+06	1.01228		23.6437	21.7927	1.851	277200	0.824393		21.073	21.7927	-0.7197	1.64684e+06	1.03633
Young 2	22.004	24.299	22.004	2.295	203768	1.07507		21.7531	22.004	-0.2509	1.18995e+06	0.902221		23.0333	22.004	1.0293	489948	1.01452		23.2822	22.004	1.2782	412310	1.07592		18.9557	22.004	-3.0483	8.27237e+06	1.47013		22.0363	22.004	0.0323	977860	0.844289		24.2693	22.004	2.2653	208006	0.618611		20.9622	22.004	-1.0418	2.05879e+06	1.29556
Young 3	21.5816	24.3231	21.5816	2.7415	149529	0.788905		21.0229	21.5816	-0.5587	1.47294e+06	1.11679		22.4626	21.5816	0.881	542991	1.12436		23.0752	21.5816	1.4936	355125	0.926695		19.2805	21.5816	-2.3011	4.92833e+06	0.875842		21.2313	21.5816	-0.3503	1.27483e+06	1.10069		22.8925	21.5816	1.3109	403069	1.19873		21.3356	21.5816	-0.246	1.18591e+06	0.746274
Young 4	21.1571	23.5453	21.1571	2.3882	191021	1.00781		21.1278	21.1571	-0.0293	1.02052e+06	0.773757		22.434	21.1571	1.2769	412681	0.854529		22.5997	21.1571	1.4426	367904	0.96004		18.9607	21.1571	-2.1964	4.58334e+06	0.814532		21.1408	21.1571	-0.0163	1.01136e+06	0.873215		22.7844	21.1571	1.6273	323693	0.962663		20.7182	21.1571	-0.4389	1.35557e+06	0.853036
Young 5	21.2716	23.7907	21.2716	2.5191	174452	0.920394		21.1506	21.2716	-0.121	1.08749e+06	0.824535		22.3965	21.2716	1.1249	458534	0.949475		22.7809	21.2716	1.5093	351282	0.916665		19.0571	21.2716	-2.2145	4.64121e+06	0.824815		21.1375	21.2716	-0.1341	1.09741e+06	0.947507		22.5081	21.2716	1.2365	424401	1.26217		21.4932	21.2716	0.2216	857614	0.539681
Young 6	21.3241	24.1655	21.3241	2.8414	139525	0.736126		21.0373	21.3241	-0.2868	1.21993e+06	0.924953		22.746	21.3241	1.4219	373220	0.772819		22.7463	21.3241	1.4222	373143	0.973712		19.157	21.3241	-2.1671	4.4912e+06	0.798156		21.1354	21.3241	-0.1887	1.13974e+06	0.984053		22.703	21.3241	1.3789	384512	1.14354		20.731	21.3241	-0.5931	1.50848e+06	0.949262
Young 7	21.4578	24.1007	21.4578	2.6429	160106	0.844708		20.9141	21.4578	-0.5437	1.45771e+06	1.10523		22.4321	21.4578	0.9743	508987	1.05395		23.7963	21.4578	2.3385	197716	0.515937		19.2104	21.4578	-2.2474	4.74826e+06	0.843841		21.0234	21.4578	-0.4344	1.35135e+06	1.16676		22.7692	21.4578	1.3114	402930	1.19831		21.0674	21.4578	-0.3904	1.31076e+06	0.824835
Young 8	21.3582	23.3535	21.3582	1.9953	250816	1.32329		20.7907	21.3582	-0.5675	1.48195e+06	1.12362		22.2944	21.3582	0.9362	522608	1.08215		22.5779	21.3582	1.2197	429372	1.12044		19.0268	21.3582	-2.3314	5.03294e+06	0.894432		21.1804	21.3582	-0.1778	1.13116e+06	0.976646		22.866	21.3582	1.5078	351647	1.0458		20.4958	21.3582	-0.8624	1.81806e+06	1.14407
Young 9	22.0163	23.6721	22.0163	1.6558	317362	1.67438		21.5523	22.0163	-0.464	1.37936e+06	1.04583		22.8379	22.0163	0.8216	565814	1.17162		22.9596	22.0163	0.9433	520042	1.35704		19.1753	22.0163	-2.841	7.16517e+06	1.27336		21.6464	22.0163	-0.3699	1.29226e+06	1.11575		23.8838	22.0163	1.8675	274048	0.815018		21.0153	22.0163	-1.001	2.00139e+06	1.25944
Young 10	21.8593	24.6963	21.8593	2.837	139952	0.738374		21.3793	21.8593	-0.48	1.39474e+06	1.0575		22.8805	21.8593	1.0212	492706	1.02024		23.4399	21.8593	1.5806	334343	0.872464		19.2201	21.8593	-2.6392	6.22986e+06	1.10714		21.6783	21.8593	-0.181	1.13367e+06	0.978815		23.5352	21.8593	1.6759	312971	0.930774		20.7565	21.8593	-1.1028	2.14771e+06	1.35152
n	10			10	10	10				10	10	10				10	10	10				10	10	10				10	10	10				10	10	10				10	10	10				10	10	10
mean	21.5823			2.44822	189540	1				-0.38719	1.31891e+06	1				1.06018	482934	1				1.42544	383217	1				-2.46133	5.62696e+06	1				-0.20497	1.15821e+06	1				1.60325	336248	1				-0.61745	1.58911e+06	1
SD	0.315683			0.381327	56154.8	0.296269				0.200541	174938	0.132638				0.182329	58581.1	0.121303				0.383759	89594.8	0.233796				0.307994	1.29074e+06	0.229385				0.149092	119507	0.103183				0.323173	69721.6	0.207352				0.416228	420917	0.264875
SE	0.0998278			0.120586	17757.7	0.0936883				0.0634167	55320.1	0.0419438				0.0576574	18525	0.0383592				0.121355	28332.4	0.0739329				0.0973961	408168	0.0725379				0.0471471	37791.4	0.0326292				0.102196	22047.9	0.0655704				0.131623	133106	0.0837609
Aged 1	21.9377	24.4598	21.9377	2.5221	174089	0.918483		21.4739	21.9377	-0.4638	1.37917e+06	1.04569		23.0748	21.9377	1.1371	454673	0.94148		23.4126	21.9377	1.4749	359758	0.938785		19.3592	21.9377	-2.5785	5.97318e+06	1.06153		21.4116	21.9377	-0.5261	1.44003e+06	1.24333		23.071	21.9377	1.1333	455872	1.35576		21.1746	21.9377	-0.7631	1.69713e+06	1.06798
Aged 2	21.3304	24.3471	21.3304	3.0167	123561	0.651901		20.5473	21.3304	-0.7831	1.72082e+06	1.30473		22.3732	21.3304	1.0428	485385	1.00507		22.989	21.3304	1.6586	316746	0.826546		19.0018	21.3304	-2.3286	5.02318e+06	0.892697		21.2538	21.3304	-0.0766	1.05453e+06	0.910486		23.1798	21.3304	1.8494	277508	0.825307		20.6371	21.3304	-0.6933	1.61698e+06	1.01753
Aged 3	21.2575	23.6978	21.2575	2.4403	184245	0.972065		20.8655	21.2575	-0.392	1.31221e+06	0.99492		22.3435	21.2575	1.086	471066	0.975424		22.9494	21.2575	1.6919	309519	0.807686		18.9739	21.2575	-2.2836	4.86891e+06	0.865283		21.2546	21.2575	-0.0029	1.00201e+06	0.865142		22.9452	21.2575	1.6877	310421	0.923192		20.861	21.2575	-0.3965	1.31631e+06	0.82833
Aged 4	21.2036	23.663	21.2036	2.4594	181822	0.95928		20.336	21.2036	-0.8676	1.82463e+06	1.38343		22.1566	21.2036	0.953	516557	1.06962		22.9706	21.2036	1.767	293819	0.766717		18.9426	21.2036	-2.261	4.79324e+06	0.851833		20.9306	21.2036	-0.273	1.20832e+06	1.04327		22.5651	21.2036	1.3615	389177	1.15741		20.6455	21.2036	-0.5581	1.47233e+06	0.92651
Aged 5	21.0631	23.2759	21.0631	2.2128	215715	1.1381		20.0975	21.0631	-0.9656	1.95288e+06	1.48067		22.0535	21.0631	0.9904	503338	1.04225		23.0935	21.0631	2.0304	244787	0.638769		18.6063	21.0631	-2.4568	5.48998e+06	0.975655		20.7747	21.0631	-0.2884	1.22129e+06	1.05446		22.3619	21.0631	1.2988	406464	1.20882		20.4433	21.0631	-0.6198	1.53666e+06	0.966993
Aged 6	21.511	23.248	21.511	1.737	299993	1.58274		20.8079	21.511	-0.7031	1.628e+06	1.23435		22.4353	21.511	0.9243	526936	1.09111		22.7828	21.511	1.2718	414143	1.0807		18.9581	21.511	-2.5529	5.86813e+06	1.04286		21.1853	21.511	-0.3257	1.25327e+06	1.08208		23.1283	21.511	1.6173	325945	0.969359		20.8082	21.511	-0.7028	1.62766e+06	1.02426
Aged 7	21.6287	25.1053	21.6287	3.4766	89833.7	0.473956		20.8624	21.6287	-0.7663	1.7009e+06	1.28963		22.508	21.6287	0.8793	543631	1.12568		23.6543	21.6287	2.0256	245603	0.640898		19.0942	21.6287	-2.5345	5.79376e+06	1.02964		21.4785	21.6287	-0.1502	1.10972e+06	0.95814		23.1802	21.6287	1.5515	341155	1.01459		21.372	21.6287	-0.2567	1.19474e+06	0.75183
Aged 8	21.5321	23.9204	21.5321	2.3883	191007	1.00774		20.7508	21.5321	-0.7813	1.71868e+06	1.3031		22.3502	21.5321	0.8181	567188	1.17446		23.3619	21.5321	1.8298	281304	0.734058		19.2526	21.5321	-2.2795	4.8551e+06	0.862827		21.5081	21.5321	-0.024	1.01677e+06	0.877888		23.1783	21.5321	1.6462	319481	0.950134		21.2128	21.5321	-0.3193	1.24773e+06	0.785171
Aged 9	21.4234	22.9449	21.4234	1.5215	348324	1.83773		20.711	21.4234	-0.7124	1.63853e+06	1.24233		22.1143	21.4234	0.6909	619467	1.28272		22.562	21.4234	1.1386	454200	1.18523		18.8541	21.4234	-2.5693	5.93521e+06	1.05478		21.1286	21.4234	-0.2948	1.22671e+06	1.05915		23.1049	21.4234	1.6815	311758	0.927168		21.027	21.4234	-0.3964	1.31622e+06	0.828273
Aged 10	21.2346	23.8046	21.2346	2.57	168404	0.888488		20.0939	21.2346	-1.1407	2.20488e+06	1.67174		22.0408	21.2346	0.8062	571886	1.18419		22.4687	21.2346	1.2341	425108	1.10931		18.699	21.2346	-2.5356	5.79818e+06	1.03043		20.6851	21.2346	-0.5495	1.46358e+06	1.26366		22.6479	21.2346	1.4133	375452	1.11659		21.3915	21.2346	0.1569	896950	0.564434
n	10			10	10	10				10	10	10				10	10	10				10	10	10				10	10	10				10	10	10				10	10	10				10	10	10
mean	21.4122			2.43447	197700	1.04305				-0.75759	1.70807e+06	1.29506				0.93281	526013	1.0892				1.61227	334499	0.87287				-2.43803	5.43989e+06	0.966753				-0.25112	1.19962e+06	1.03576				1.52405	351323	1.04483				-0.45491	1.39227e+06	0.876131
SD	0.252726			0.560057	76377.1	0.40296				0.218177	257507	0.195242				0.13811	50780.2	0.105149				0.321038	75198.9	0.196231				0.134012	497666	0.0884431				0.190852	160984	0.138994				0.217027	54195.7	0.161178				0.276872	245608	0.154556
SE	0.0799191			0.177106	24152.6	0.127427				0.0689937	81430.8	0.0617409				0.0436741	16058.1	0.0332511				0.101521	23780	0.0620536				0.0423782	157376	0.0279682				0.0603529	50907.7	0.0439539				0.0686299	17138.2	0.0509689				0.0875545	77668	0.048875
SUMMARY
	TFR1	TFR2	DMT1	FPN1	PCBP1	STEAP3	SEC15L1	MFRN2	ABCB7	ABCB8	ALR1	CP	FTX	TTP	LIAS	HMOX1	HMOX2	ALAS1	ALAS2	FECH	ALAD	PBGD	UROS	UROD	PPOX	ABCB10	HAMP1	BMP6	HFE
Young 1	0.89	1.11	1.28	1.13	1.1	0.92	1.02	0.96	1.01	0.82	1.04	1.08	1.27	0.98	1.04	1.11	1.1	1.18	2.11	0.02	0.01	0.98	1.09	0.98	1.03	0.7	1.11	0.78	1.09
Young 2	1.08	1.25	1.08	0.9	1.47	1.13	1.14	1.01	0.84	0.62	1.3	1.31	1.21	0.82	1.14	1.04	1.09	1.77	0.5	0.07	0.43	1.03	1.06	1.4	0.88	0.84	1.47	1.23	0.83
Young 3	0.79	1.21	0.93	1.12	0.88	1.13	0.99	1.12	1.1	1.2	0.75	1.08	0.77	0.88	1.1	1.35	1.26	1.67	1.21	0.91	1.22	1.03	1.01	1.1	1.07	1.04	1.16	1.57	1.02
Young 4	1.01	1.04	0.96	0.77	0.81	0.95	1.02	0.85	0.87	0.96	0.85	0.93	1.04	0.88	0.88	0.73	1.09	0.44	0.85	5.06	1.41	0.98	0.89	0.88	1.09	1.01	0.81	0.83	1.03
Young 5	0.92	0.9	0.92	0.82	0.82	0.99	0.92	0.95	0.95	1.26	0.54	0.87	0.75	0.98	0.92	1.06	1.01	0.73	0.91	3.65	0.97	1.18	1.09	0.92	1.01	1.5	0.59	1.19	1.13
Young 6	0.74	0.98	0.97	0.92	0.8	0.89	0.87	0.77	0.98	1.14	0.95	0.99	0.64	0.83	0.8	0.97	0.99	0.67	0.64	0.23	1.07	0.92	0.9	1.02	0.98	0.9	0.42	0.75	1.21
Young 7	0.84	0.95	0.52	1.11	0.84	0.78	0.87	1.05	1.17	1.2	0.82	0.9	0.68	1.71	0.97	0.8	0.92	0.62	1.63	0.01	2.82	0.88	0.69	0.86	0.97	1.04	1.08	1.1	1.07
Young 8	1.32	0.77	1.12	1.12	0.89	1.01	0.96	1.08	0.98	1.05	1.14	0.83	0.7	0.83	0.93	0.93	0.95	1.38	0.72	0.01	0.15	0.87	0.95	0.88	0.76	1.04	0.75	0.8	0.9
Young 9	1.67	0.91	1.36	1.05	1.27	0.99	1.21	1.17	1.12	0.82	1.26	0.96	1.78	0.89	1.18	0.96	0.57	0.86	0.52	0.02	0.24	1.15	1.37	1.04	1.16	1.25	1.51	0.95	0.77
Young 10	0.74	0.87	0.87	1.06	1.11	1.21	1.01	1.02	0.98	0.93	1.35	1.05	1.16	1.2	1.05	1.04	1.02	0.69	0.92	0.01	1.68	0.98	0.94	0.91	1.04	0.66	1.11	0.8	0.94
Aged 1	0.92	1.16	0.94	1.05	1.06	0.75	1.2	0.94	1.24	1.36	1.07	0.92	0.99	1.63	0.99	1.23	1.13	0.64	0.17	0.14	2.13	1.07	0.97	1.07	1.27	1.21	1.56	1.7	1.11
Aged 2	0.65	1.03	0.83	1.3	0.89	0.69	0.96	1.01	0.91	0.83	1.02	1.05	0.83	0.74	1.03	2.02	1.02	0.37	0.9	4.35	3.6	0.81	0.83	0.91	0.87	0.9	0.95	1.57	0.68
Aged 3	0.97	1.03	0.81	0.99	0.87	0.63	0.78	0.98	0.87	0.92	0.83	1.11	0.93	0.64	0.86	1.56	1.01	0.49	0.65	6.35	2.55	0.84	1.07	0.8	0.91	1.07	1.07	1.68	0.62
Aged 4	0.96	0.99	0.77	1.38	0.85	0.78	1.03	1.07	1.04	1.16	0.93	1.07	0.67	0.57	0.92	1.64	1.06	0.52	0.57	1.26	1.87	0.9	0.89	0.7	0.81	1.06	0.93	1.98	0.9
Aged 5	1.14	0.7	0.64	1.48	0.98	0.59	0.96	1.04	1.05	1.21	0.97	0.88	0.72	1.3	0.9	1.88	0.86	0.92	0.41	0.09	0.49	1.03	0.9	0.9	1.25	1.01	0.99	1.76	1.15
Aged 6	1.58	1	1.08	1.23	1.04	0.94	1.05	1.09	1.08	0.97	1.02	0.98	1.05	0.89	0.92	1.65	1	0.88	0.69	0.02	0.01	1.07	1.18	0.96	1	0.8	1.41	2.52	1.02
Aged 7	0.47	1.06	0.64	1.29	1.03	0.63	0.97	1.13	0.96	1.01	0.75	1.29	1.7	1.36	0.88	1.76	0.74	0.66	0.84	0.18	4.03	1.01	0.97	0.93	1.12	0.92	1.59	2.93	0.93
Aged 8	1.01	1.15	0.73	1.3	0.86	0.62	0.87	1.17	0.88	0.95	0.79	0.95	1.15	1.17	0.98	2.12	0.72	0.95	1.1	0.59	4.64	0.96	0.85	0.88	1.4	1.07	1.11	1.15	0.8
Aged 9	1.84	1.08	1.19	1.24	1.05	0.68	1.07	1.28	1.06	0.93	0.83	1.14	1.36	0.75	0.97	1.48	0.8	0.74	3.35	0.35	2.91	0.84	1.13	0.88	1	1.18	0.84	1.63	0.8
Aged 10	0.89	1.11	1.11	1.67	1.03	0.59	1.24	1.18	1.26	1.12	0.56	1.31	1.24	1.53	0.87	1.97	0.88	1.45	0.37	0.03	2.9	0.86	0.8	0.94	0.83	1.14	1.09	1.58	0.91
[truncated: 106 more columns]
