# Supplementary material for: Aging is associated with increased brain iron through cortex-derived hepcidin expression
Source: eLife. 2022 Jan 11;11:e73456. doi: 10.7554/eLife.73456 (PMC8752087; doi:10.7554/eLife.73456)
Supplement: Figure 2—source data 3. [file elife-73456-fig2-data3.xlsx]

## Sheet: qRT-PCR Brain
Brain qRT-PCR	HPRT	TfR1	HPRT	DCT	RE	TfR1		FPN1	HPRT	DCT	RE	FPN1		MFRN2	HPRT	DCT	RE	MFRN2		DMT1	HPRT	DCT	RE	DMT1		PCBP1	HPRT	DCT	RE	PCBP		STEAP3	HPRT	DCT	RE	STEAP3		ABCB7	HPRT	DCT	RE	ABCB7		ABCB8	HPRT	DCT	RE	ABCB8
Young 1	19.2287	21.0474	19.2287	1.8187	283476	0.916674		25.0854	19.2287	5.8567	17256.7	0.978848		21.8537	19.2287	2.625	162105	1.0182		21.7293	19.2287	2.5006	176703	1.07769		18.727	19.2287	-0.5017	1.41588e+06	1.17079		29.573	19.2287	10.3443	769.229	1.03115		21.0287	19.2287	1.8	287175	1.11384		22.0977	19.2287	2.869	136882	0.925747
Young 2	19.3986	20.6366	19.3986	1.238	423960	1.37096		25.0129	19.3986	5.6143	20414	1.15794		22.1497	19.3986	2.7511	148538	0.93298		22.0906	19.3986	2.692	154749	0.943791		19.0553	19.3986	-0.3433	1.26866e+06	1.04905		30.4603	19.3986	11.0617	467.839	0.627138		21.2457	19.3986	1.8471	277951	1.07807		22.588	19.3986	3.1894	109621	0.741382
Young 3	19.2404	21.0691	19.2404	1.8287	281518	0.910343		25.3171	19.2404	6.0767	14816	0.840405		22.052	19.2404	2.8116	142437	0.894664		21.9553	19.2404	2.7149	152312	0.928928		19.0733	19.2404	-0.1671	1.1228e+06	0.928444		28.8235	19.2404	9.5831	1303.77	1.7477		21.2255	19.2404	1.9851	252595	0.979725		22.0842	19.2404	2.8438	139294	0.942059
Young 4	19.1332	20.6921	19.1332	1.5589	339410	1.09755		25.1061	19.1332	5.9729	15921.3	0.9031		22.0135	19.1332	2.8803	135814	0.853059		21.8933	19.1332	2.7601	147614	0.900276		19.0291	19.1332	-0.1041	1.07482e+06	0.888773		29.9345	19.1332	10.8013	560.383	0.751192		21.2379	19.1332	2.1047	232500	0.901781		22.1312	19.1332	2.998	125173	0.846563
Young 5	19.4154	21.3093	19.4154	1.8939	269079	0.870117		25.3499	19.4154	5.9345	16350.7	0.92746		22.17	19.4154	2.7546	148178	0.930719		22.098	19.4154	2.6826	155760	0.94996		19.3906	19.4154	-0.0248	1.01734e+06	0.841238		31.2308	19.4154	11.8154	277.466	0.371943		21.2662	19.4154	1.8508	277239	1.07531		21.8528	19.4154	2.4374	184616	1.24858
Young 6	19.2815	21.2458	19.2815	1.9643	256264	0.828677		25.2874	19.2815	6.0059	15561.2	0.882677		22.2285	19.2815	2.947	129677	0.814518		22.2544	19.2815	2.9729	127370	0.776813		19.0998	19.2815	-0.1817	1.13422e+06	0.937887		30.1121	19.2815	10.8306	549.117	0.73609		21.6907	19.2815	2.4092	188260	0.730192		21.7768	19.2815	2.4953	177354	1.19946
Young 7	19.45	20.7673	19.45	1.3173	401285	1.29763		25.0461	19.45	5.5961	20673.1	1.17264		21.6543	19.45	2.2043	216990	1.36294		21.879	19.45	2.429	185694	1.13252		19.0025	19.45	-0.4475	1.36368e+06	1.12762		29.5036	19.45	10.0536	940.946	1.26134		21.339	19.45	1.889	269994	1.04721		21.7768	19.45	2.3268	199326	1.34806
Young 8	19.2896	21.2917	19.2896	2.0021	249636	0.807247		24.6093	19.2896	5.3197	25038.6	1.42026		21.8327	19.2896	2.5431	171574	1.07767		21.5107	19.2896	2.2211	214478	1.30807		18.9101	19.2896	-0.3795	1.30089e+06	1.07571		29.828	19.2896	10.5384	672.397	0.901347		21.1536	19.2896	1.864	274714	1.06551		21.7898	19.2896	2.5002	176752	1.1954
Young 9	19.3654	21.1977	19.3654	1.8323	280817	0.908074		25.3062	19.3654	5.9408	16279.5	0.923419		22.0673	19.3654	2.7019	153691	0.965346		22.1245	19.3654	2.7591	147716	0.9009		19.2907	19.3654	-0.0747	1.05314e+06	0.870844		29.841	19.3654	10.4756	702.312	0.941449		21.3502	19.3654	1.9848	252648	0.979928		22.7091	19.3654	3.3437	98502.2	0.666183
Young 10	19.5927	21.2964	19.5927	1.7037	306998	0.992736		25.7527	19.5927	6.16	13984.8	0.793255		22.0422	19.5927	2.4495	183074	1.14991		22.0888	19.5927	2.4961	177255	1.08105		19.1684	19.5927	-0.4243	1.34192e+06	1.10964		29.2758	19.5927	9.6831	1216.46	1.63066		21.5078	19.5927	1.9151	265154	1.02843		22.5241	19.5927	2.9314	131087	0.88656
n	10			10	10	10				10	10	10				10	10	10				10	10	10				10	10	10				10	10	10				10	10	10				10	10	10
mean	19.3395			1.71579	309244	1				5.84776	17629.6	1				2.66684	159208	1				2.62284	163965	1				-0.26487	1.20933e+06	1				10.5187	745.991	1				1.96498	257823	1				2.7935	147861	1
SD	0.131975			0.263356	60332.8	0.195098				0.258955	3397.79	0.192732				0.220928	25897.7	0.162666				0.212591	24768.3	0.151058				0.173293	144701	0.119653				0.664662	324.622	0.435155				0.179586	29183.6	0.113192				0.341254	34306.9	0.232022
SE	0.0417341			0.0832804	19078.9	0.0616953				0.0818888	1074.47	0.0609472				0.0698636	8189.57	0.0514395				0.0672271	7832.41	0.0477687				0.0547999	45758.5	0.0378377				0.210185	102.654	0.137608				0.05679	9228.66	0.0357946				0.107914	10848.8	0.0733717
Aged 1	19.1738	21.2755	19.1738	2.1017	232984	0.753397		25.1807	19.1738	6.0069	15550.4	0.882065		21.5719	19.1738	2.3981	189714	1.19161		21.76	19.1738	2.5862	166524	1.0156		18.8474	19.1738	-0.3264	1.25388e+06	1.03684		29.7702	19.1738	10.5964	645.901	0.865829		21.2384	19.1738	2.0646	239053	0.927197		21.555	19.1738	2.3812	191950	1.29818
Aged 2	19.1053	20.7522	19.1053	1.6469	319326	1.0326		25.0645	19.1053	5.9592	16073.2	0.911716		21.4372	19.1053	2.3319	198622	1.24757		21.7145	19.1053	2.6092	163890	0.999542		18.8398	19.1053	-0.2655	1.20205e+06	0.993978		28.7577	19.1053	9.6524	1242.62	1.66573		21.1393	19.1053	2.034	244177	0.947073		21.9828	19.1053	2.8775	136077	0.920309
Aged 3	18.8585	20.968	18.8585	2.1095	231727	0.749334		25.2601	18.8585	6.4016	11828.4	0.670941		21.3643	18.8585	2.5058	176067	1.1059		21.7313	18.8585	2.8728	136521	0.832625		18.7055	18.8585	-0.153	1.11188e+06	0.919414		29.0007	18.8585	10.1422	884.899	1.18621		20.9324	18.8585	2.0739	237517	0.92124		22.0348	18.8585	3.1763	110621	0.748145
Aged 4	19.0685	20.5724	19.0685	1.5039	352599	1.1402		25.1137	19.0685	6.0452	15143.1	0.858956		21.5747	19.0685	2.5062	176019	1.10559		21.8073	19.0685	2.7388	149809	0.913666		18.7586	19.0685	-0.3099	1.23962e+06	1.02504		29.369	19.0685	10.3005	792.94	1.06294		21.0109	19.0685	1.9424	260183	1.00916		21.4094	19.0685	2.3409	197387	1.33495
Aged 5	19.4442	21.1102	19.4442	1.666	315126	1.01902		24.9569	19.4442	5.5127	21903.4	1.24242		21.7573	19.4442	2.3131	201228	1.26393		22.3865	19.4442	2.9423	130101	0.793465		19.1116	19.4442	-0.3326	1.25928e+06	1.0413		30.8163	19.4442	11.3721	377.274	0.505735		21.22	19.4442	1.7758	292032	1.13269		21.8194	19.4442	2.3752	192750	1.30359
Aged 6	19.2138	21.0513	19.2138	1.8375	279806	0.904807		25.488	19.2138	6.2742	12920.4	0.732884		21.7674	19.2138	2.5536	170329	1.06986		21.925	19.2138	2.7112	152703	0.931314		19.0918	19.2138	-0.122	1.08824e+06	0.899869		28.7897	19.2138	9.5759	1310.29	1.75644		21.2453	19.2138	2.0315	244601	0.948716		22.4087	19.2138	3.1949	109204	0.738561
Aged 7	19.6784	21.2491	19.6784	1.5707	336645	1.08861		25.0453	19.6784	5.3669	24232.7	1.37455		21.9155	19.6784	2.2371	212112	1.3323		22.013	19.6784	2.3346	198251	1.2091		19.1526	19.6784	-0.5258	1.43973e+06	1.19052		29.6141	19.6784	9.9357	1021.07	1.36875		21.6604	19.6784	1.982	253139	0.981832		22.7945	19.6784	3.1161	115335	0.780024
Aged 8	20.0127	21.4716	20.0127	1.4589	363770	1.17632		25.4181	20.0127	5.4054	23594.6	1.33835		22.2237	20.0127	2.211	215985	1.35662		22.1911	20.0127	2.1784	220921	1.34736		19.4479	20.0127	-0.5648	1.47918e+06	1.22314		28.8645	20.0127	8.8518	2164.43	2.90141		21.6406	20.0127	1.6279	323559	1.25497		22.4967	20.0127	2.484	178748	1.2089
Aged 9	19.3367	20.7559	19.3367	1.4192	373920	1.20914		25.551	19.3367	6.2143	13468.2	0.763954		21.6719	19.3367	2.3352	198169	1.24472		21.6015	19.3367	2.2648	208079	1.26904		19.0762	19.3367	-0.2605	1.19789e+06	0.99054		28.7459	19.3367	9.4092	1470.78	1.97158		21.1851	19.3367	1.8484	277700	1.0771		22.3363	19.3367	2.9996	125035	0.845625
Aged 10	19.2202	20.6968	19.2202	1.4766	359335	1.16198		25.0211	19.2202	5.8009	17937.2	1.01745		21.569	19.2202	2.3488	196309	1.23304		21.639	19.2202	2.4188	187012	1.14056		18.9536	19.2202	-0.2666	1.20297e+06	0.994737		30.1557	19.2202	10.9355	510.607	0.684468		21.1748	19.2202	1.9546	257992	1.00066		22.099	19.2202	2.8788	135955	0.91948
n	10			10	10	10				10	10	10				10	10	10				10	10	10				10	10	10				10	10	10				10	10	10				10	10	10
mean	19.3112			1.67909	316524	1.02354				5.89873	17265.2	0.979329				2.37408	193455	1.21511				2.56571	171381	1.04523				-0.31271	1.24747e+06	1.03154				10.0772	1042.08	1.39691				1.93351	262995	1.02006				2.78245	149306	1.00978
SD	0.331354			0.255956	52273.8	0.169037				0.367432	4500.49	0.25528				0.115767	15377.8	0.0965896				0.259297	30876.7	0.188313				0.140833	125227	0.10355				0.755477	529.592	0.709917				0.143365	27431.4	0.106396				0.35165	36644.7	0.247833
SE	0.104783			0.0809404	16530.4	0.0534543				0.116192	1423.18	0.0807268				0.0366086	4862.89	0.0305443				0.0819968	9764.08	0.0595497				0.0445354	39600.3	0.0327455				0.238903	167.472	0.224495				0.0453361	8674.56	0.0336454				0.111202	11588.1	0.0783716
SUMMARY
	TFR1	TFR2	DMT1	FPN1	PCBP1	STEAP3	SEC15L1	MFRN2	ABCB7	ABCB8	ALR1	CP	FTX	TTP	LIAS	HMOX1	HMOX2	ALAS1	ALAS2	FECH	ALAD	PBGD	UROS	UROD	PPOX	ABCB10	HAMP1	BMP6	HFE	FTMT
Young 1	0.92	0.66	1.54	0.98	1.17	1.03	1.15	1.02	1.11	0.93	1.15	0.72	0.86	1.2	1.09	1.22	1.08	0.92	0.96	0.04	0.01	1.32	1.05	1.15	1.21	1.43	0.36	1.06	1.48	2.85
Young 2	1.37	0.72	0.87	1.16	1.05	0.63	1.13	0.93	1.08	0.74	0.98	0.88	1.13	0.97	1.05	0.98	1.02	1.25	1.02	0.14	0.46	1.01	1.04	1.19	0.98	1.06	0.39	0.95	1.11	0.52
Young 3	0.91	0.82	0.86	0.84	0.93	1.75	0.82	0.89	0.98	0.94	0.74	1.22	0.87	0.95	1	0.97	1	0.89	2.01	3.57	1.75	0.85	0.79	1.15	1.09	0.85	2.36	1.03	0.74	0.34
Young 4	1.1	1.06	1.01	0.9	0.89	0.75	0.99	0.85	0.9	0.85	0.82	0.75	0.79	0.76	0.99	1.39	1.06	0.93	0.46	3.64	2.15	1.04	0.94	0.88	0.82	0.66	0.87	0.78	1.6	0.56
Young 5	0.87	0.95	0.87	0.93	0.84	0.37	0.92	0.93	1.08	1.25	0.78	0.75	0.96	0.93	0.85	0.89	1.15	0.96	0.9	1.36	1.55	0.96	1.25	0.8	0.85	0.96	0.75	1.32	0.75	0.65
Young 6	0.83	1.39	0.81	0.88	0.94	0.74	0.88	0.81	0.73	1.2	0.85	0.94	0.91	0.85	0.87	0.85	0.95	0.86	0.55	0.15	2.05	1.03	1.29	0.77	0.84	0.73	0.65	1.62	0.97	0.1
Young 7	1.3	1.17	1.1	1.17	1.13	1.26	1.2	1.36	1.05	1.35	1.2	1.09	1.14	1.16	1.22	1.29	1.16	1.21	1.42	0.03	0.93	1.04	0.61	1.18	1.2	1.34	N/A	0.45	0.85	2.06
Young 8	0.81	0.98	0.77	1.42	1.08	0.9	1.06	1.08	1.07	1.2	1.24	2.44	1.23	1.29	1.11	1.01	0.99	0.99	0.94	0.03	0.04	1.1	1.2	1.01	0.98	1.18	N/A	1.04	0.55	0.33
Young 9	0.91	1.15	1.11	0.92	0.87	0.94	0.85	0.97	0.98	0.67	1.31	0.6	0.88	0.9	0.77	0.42	0.71	0.9	0.57	N/A	0.31	0.76	0.76	0.87	0.81	0.95	1.34	0.58	0.82	1.2
Young 10	0.99	1.08	1.05	0.79	1.11	1.63	0.99	1.15	1.03	0.89	0.94	0.6	1.23	0.99	1.05	0.99	0.89	1.08	1.18	0.03	0.75	0.89	1.07	1	1.22	0.85	1.26	1.16	1.14	1.4
Aged 1	0.75	2.77	1.13	0.88	1.04	0.87	0.89	1.19	0.93	1.3	0.95	2.3	1.17	1.32	1.04	0.96	1.03	0.94	0.82	0.08	1.77	0.87	0.77	1.06	1.39	1.02	Outlier (High)	1.38	0.76	2.04
Aged 2	1.03	1.76	0.7	0.91	0.99	1.67	0.9	1.25	0.95	0.92	1.01	1.01	1.15	1.1	1.17	1.02	1.18	1.03	1.06	2.39	4.53	0.96	1	1.2	0.95	1.04	7.61	0.55	0.77	2.94
Aged 3	0.75	1.12	0.97	0.67	0.92	1.19	0.63	1.11	0.92	0.75	0.81	1.41	0.76	1	0.9	1.15	1.03	0.8	1.13	5.61	3.01	0.65	0.82	1.01	1.03	0.98	3.84	1.44	1.45	1.36
Aged 4	1.14	2.06	0.81	0.86	1.03	1.06	0.88	1.11	1.01	1.33	0.89	0.9	0.91	1.04	1.04	0.84	1.13	0.98	1.25	1.35	3.55	0.96	1.03	1.07	1.34	1.09	2.33	0.94	1.08	0.75
Aged 5	1.02	1.31	1.27	1.24	1.04	0.51	0.89	1.26	1.13	1.3	1.04	0.88	1	1.76	1.05	1.89	0.72	1.05	0.67	0.09	1.34	1.3	1.02	1.27	1.26	1.07	7.96	0.98	1.09	1.64
Aged 6	0.9	1.04	1.05	0.73	0.9	1.76	0.67	1.07	0.95	0.74	0.72	1.25	0.69	1.32	0.83	0.99	0.95	0.9	1.23	0.02	0.06	0.75	0.73	1.07	0.98	0.83	1.62	1.79	0.85	1.29
Aged 7	1.09	1.86	1.47	1.37	1.19	1.37	1.1	1.33	0.98	0.78	1.15	1.05	0.98	1.35	1.08	1.64	0.91	1.17	0.79	0.04	2.7	1.28	1.04	1.13	1.09	1.05	2.6	1.72	0.76	0.76
Aged 8	1.18	4	1.19	1.34	1.22	2.9	1.02	1.36	1.25	1.21	1.04	3.95	1.43	2.24	1.36	1.5	1.34	1.26	2.59	0.31	4.42	1.1	1.07	1.32	1.3	1.55	2.65	4.95	1.15	2.3
Aged 9	1.21	0.8	1.49	0.76	0.99	1.97	0.84	1.24	1.08	0.85	0.9	0.86	0.97	1.15	1.09	0.89	1.01	1.03	3.53	0.08	2.35	0.69	0.84	1.1	0.98	1.22	0.75	0.99	1.12	0.68
Aged 10	1.16	1.31	1.76	1.02	0.99	0.68	1.05	1.23	1	0.92	0.97	0.98	0.92	1.15	1.18	0.83	1.02	0.94	0.77	0.03	2.98	1.03	1.07	0.98	0.88	1.21	1.73	0.94	1.05	1.06
[truncated: 112 more columns]
