# Supplementary material for: Aging is associated with increased brain iron through cortex-derived hepcidin expression
Source: eLife. 2022 Jan 11;11:e73456. doi: 10.7554/eLife.73456 (PMC8752087; doi:10.7554/eLife.73456)
Supplement: Figure 2—source data 4. [file elife-73456-fig2-data4.xlsx]

## Sheet: Densitometry
Membrane TS 54	HAMP1	Average of Young	ratio		aTubulin	Average of Young	ratio		R HAMP1/aTubulin
Young brain1	2212.01	1775.54	1.24582		27749.1	27611.2	1.00499		1.23963
Young brain2	2018.72		1.13696		28418		1.02922		1.10468
Young brain3	1095.89		0.617215		26666.6		0.965788		0.639079
Aged brain1	2465.74		1.38873		25174.1		0.911735		1.52317
Aged brain2	7944.37		4.47434		26308.2		0.952809		4.69594
Aged brain3	3932.42		2.21477		26024.7		0.942541		2.34979
Membrane TS 57	HAMP1	Average of Young	ratio		aTubulin	Average of Young	ratio		R HAMP1/aTubulin
Young brain4	1275.47	2973.6	0.42893		14635.9	14416.1	1.01525		0.422489
Young brain5	2727.82		0.917346		14982.2		1.03927		0.882685
Young brain6	4917.52		1.65372		13630.3		0.945487		1.74907
Aged brain4	6169.08		2.07461		13519.7		0.937819		2.21217
Aged brain5	3362.27		1.13071		14372.4		0.996969		1.13414
Aged brain6	4606.81		1.54924		13642.4		0.946331		1.6371
