# Supplementary material for: Aging is associated with increased brain iron through cortex-derived hepcidin expression
Source: eLife. 2022 Jan 11;11:e73456. doi: 10.7554/eLife.73456 (PMC8752087; doi:10.7554/eLife.73456)
Supplement: Figure 3—source data 2. [file elife-73456-fig3-data2.xlsx]

## Sheet: Densitometry
Membrane TS 29	TfR1	Average of Young	ratio		FPN1	Average of lane 1-4	ratio		GAPDH	Average of lane 1-4	ratio		R TfR1/GAPDH	R FPN1/GAPDH
Young brain2	11191.6	10598.8	1.05593		7861.03	7955.72	0.988098		9325.69	9517.62	0.979835		1.07766	1.00843
Young brain3	9931.23		0.937014		7831.69		0.98441		9574.52		1.00598		0.931445	0.978559
Young brain4	10673.6		1.00706		8174.45		1.02749		9652.64		1.01419		0.992969	1.01312
Aged brain1	10140.1		0.956717		5831.26		0.732964		9453.1		0.993222		0.963246	0.737966
Aged brain2	9937.47		0.937603		5607.72		0.704866		9204.45		0.967096		0.969504	0.728848
Aged brain3	9530.52		0.899207		5066.43		0.636828		9831.69		1.033		0.870482	0.616484
Membrane TSIP1	FPN1	Average of Young	ratio		Ub	Average of Young	ratio		R Ubiquitinated FPN1
Young brain1	3071.06	2416.22	1.27102		4251.02	3385.06	1.25582		0.988039
Young brain2	2577.18		1.06662		3354.14		0.990865		0.928977
Young brain3	1600.41		0.66236		2550.03		0.753318		1.13732
Aged brain1	3894.26		1.61172		12856.4		3.798		2.35649
Aged brain2	2978.77		1.23282		12150.6		3.58948		2.91159
Aged brain3	4008.01		1.6588		21725.6		6.41809		3.86913
