# Supplementary material for: Aging is associated with increased brain iron through cortex-derived hepcidin expression
Source: eLife. 2022 Jan 11;11:e73456. doi: 10.7554/eLife.73456 (PMC8752087; doi:10.7554/eLife.73456)
Supplement: Figure 3—source data 3. [file elife-73456-fig3-data3.xlsx]

## Sheet: Aconitase assay
Brain	Protein Conc (mg/mL)	Values (mOD)	ACO assay (mOD/min/μg)
Cytosol Young 1	1.887	7.858	4.16428
Cytosol Young 2	1.31	6.115	4.66794
Cytosol Young 3	1.558	6.882	4.4172
Cytosol Young 4	1.592	6.856	4.30653
Cytosol Aged 1	1.643	5.285	3.21668
Cytosol Aged 2	1.493	4.894	3.27796
Cytosol Aged 3	1.395	4.985	3.57348
Cytosol Aged 4	1.379	4.987	3.61639
Mitochondrial Young 1	3.478	3.01	0.945946
Mitochondrial Young 2	3.12	3.674	0.939402
Mitochondrial Young 3	3.551	4.601	1.35443
Mitochondrial Young 4	3.456	3.368	1.29838
Mitochondrial Aged 1	2.539	1.167	0.512516
Mitochondrial Aged 2	1.635	1.545	0.827088
Mitochondrial Aged 3	2.297	1.548	0.68435
Mitochondrial Aged 4	2.097	2.224	0.893891
